# Supplementary material for: Spiclypeus shipporum gen. et sp. nov., a Boldly Audacious New Chasmosaurine Ceratopsid (Dinosauria: Ornithischia) from the Judith River Formation (Upper Cretaceous: Campanian) of Montana, USA
Source: PubMed Central journal article supplement (PMC4871577; doi:10.1371/journal.pone.0154218), 2016-05-18
Supplement: pone.0154218.s003.pdf [file pone.0154218.s003.pdf]

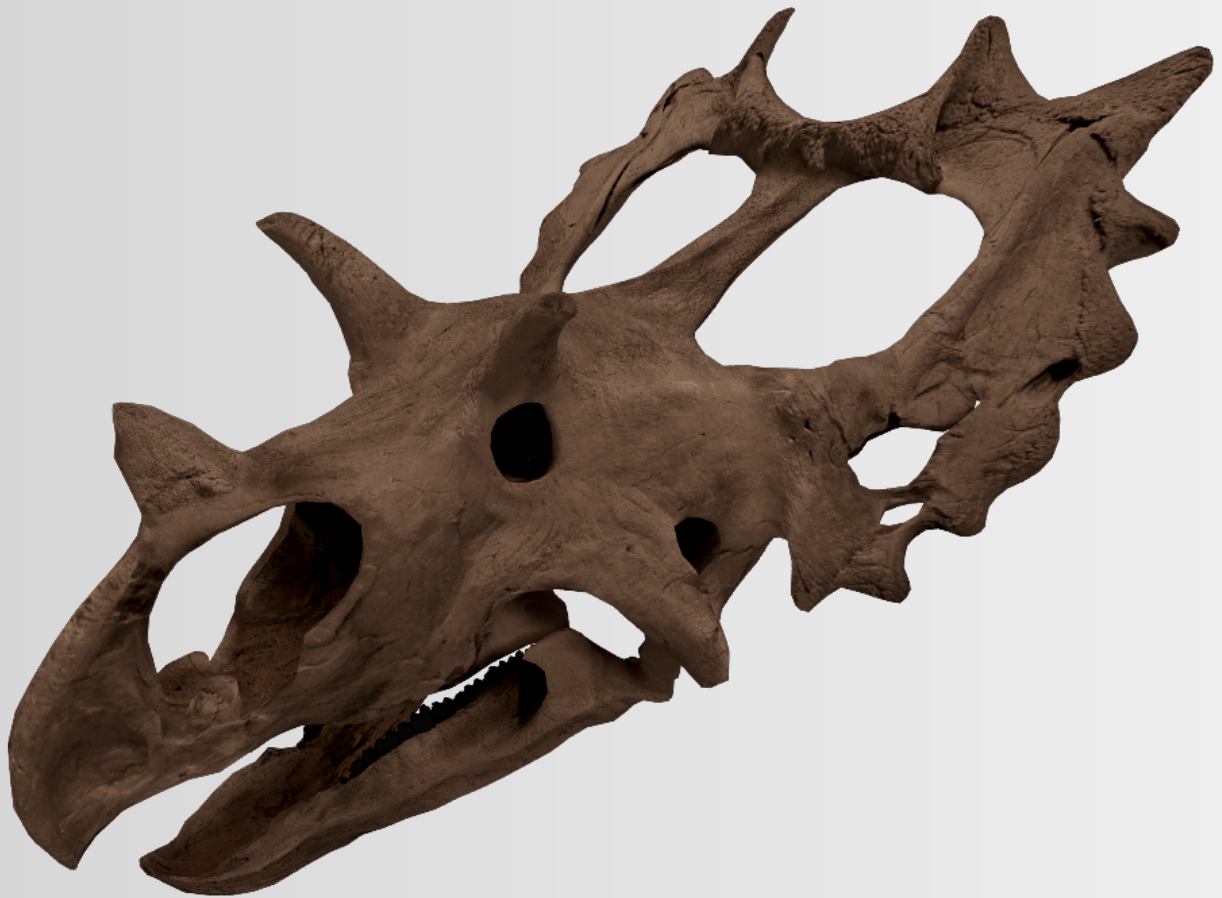

Skull reconstruction of *Spiclypeus shipporum* gen. et sp. nov. (CMN 57081).  
Original reconstruction courtesy of Black Hills Institute of Geological Research, Inc.
